# Supplementary material for: Exploring a hybrid ferroelectric with a 1-D perovskite-like structure: bis(pyrrolidinium) pentachloroantimonate(iii)
Source: Royal Society of Chemistry journal article supplement (doi:10.1039/c9tc02849h), 2019-01-01
Supplement: c9tc02849h1.pdf [file c9tc02849h1.pdf]

# ELECTRONIC SUPPLEMENTARY INFORMATION

## Exploring a Hybrid Ferroelectric with 1-D Perovskite-like Structure: Bis(Pyrrolidinium) Pentachloroantimonate(III)

Martyna Książczyńska<sup>a</sup>, Anna Gagor<sup>b</sup>, Anna Piecha-Bisiorek<sup>a\*</sup>, Ryszard Jakubas<sup>a</sup>,  
Agnieszka Cizman<sup>c</sup>, Wojciech Medycki<sup>d</sup>

*(a) Faculty of Chemistry, University of Wrocław, F. Joliot-Curie 14, 50-383 Wrocław, Poland.  
E-mail: anna.piecha@chem.uni.wroc.pl*

*(b) W. Trzebiatowski Institute of Low Temperature and Structure Research Polish Academy of Sciences, P.O. Box  
1410, 50-950 Wrocław, Poland.*

*(c) Department of Experimental Physics, Faculty of Fundamental Problems of Technology, University of Science and  
Technology, Wybrzeże Wyspiańskiego 27, 50 – 370 Wrocław, Poland.*

*(d) Institute of Molecular Physics, Polish Academy of Sciences, M. Smoluchowskiego 17, 60-179 Poznań,  
Poland.*

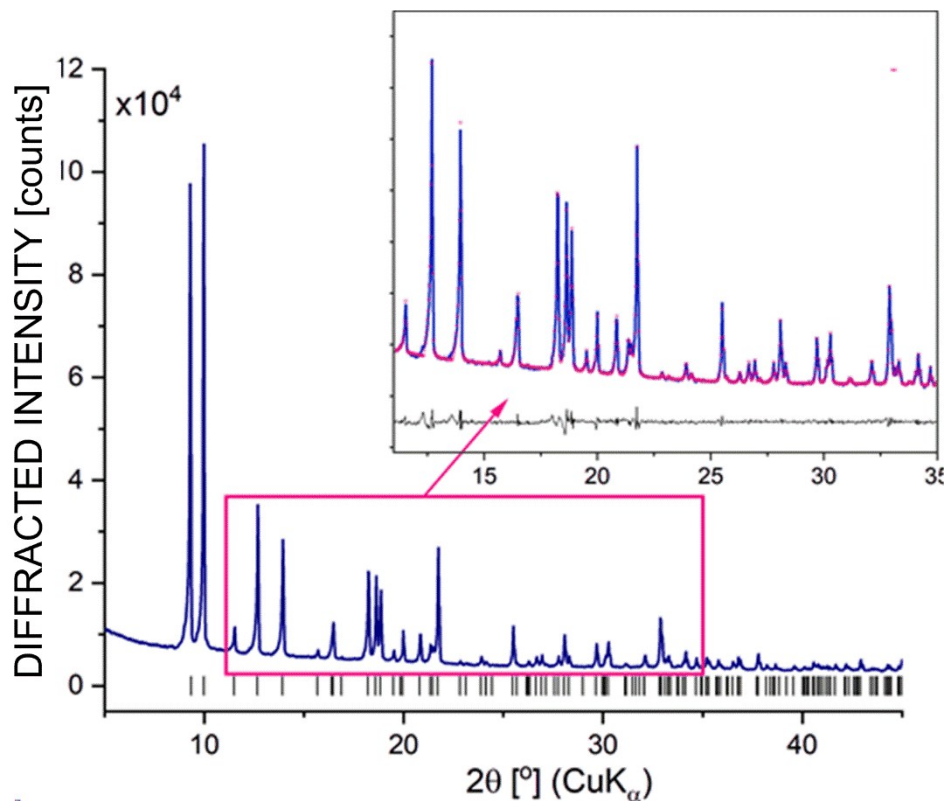

**Fig. S1.** Powder diffraction diagram of **PCA** and results of the La-Bail refinement in the inset (Jana2006). The excellent fit confirms purity of the powder samples.

**Table S1.** Selected geometric parameters (Å, °)

|                         |            |                        |            |
|-------------------------|------------|------------------------|------------|
| (270 K)                 |            |                        |            |
| Sb1—Cl1                 | 2.408 (3)  | Sb1—Cl3                | 2.811 (7)  |
| Sb1—Cl1 <sup>i</sup>    | 2.408 (3)  | Sb1—Cl4                | 2.9994 (6) |
| Sb1—Cl2                 | 2.494 (5)  | Sb1—Cl4 <sup>ii</sup>  | 2.9994 (6) |
| (255 K)                 |            |                        |            |
| Sb1—Cl10 <sup>iii</sup> | 2.402 (6)  | Sb2—Cl12 <sup>iv</sup> | 2.409 (5)  |
| Sb1—Cl10                | 2.402 (6)  | Sb2—Cl12               | 2.409 (5)  |
| Sb1—Cl20                | 2.506 (9)  | Sb2—Cl21               | 2.469 (7)  |
| Sb1—Cl30                | 2.780 (11) | Sb2—Cl40               | 2.972 (6)  |
| Sb1—Cl40                | 3.043 (6)  | Sb2—Cl40 <sup>iv</sup> | 2.972 (6)  |
| Sb1—Cl40 <sup>iii</sup> | 3.043 (6)  | Sb2—Cl31               | 2.921 (7)  |

|                               |             |                                         |             |
|-------------------------------|-------------|-----------------------------------------|-------------|
| (240 K)                       |             |                                         |             |
| Sb1—Cl10                      | 2.387 (8)   | Sb2—Cl12                                | 2.393 (9)   |
| Sb1—Cl11                      | 2.405 (8)   | Sb2—Cl21                                | 2.432 (6)   |
| Sb1—Cl20                      | 2.456 (8)   | Sb2—Cl13                                | 2.443 (8)   |
| Sb1—Cl30                      | 2.833 (8)   | Sb2—Cl41                                | 2.942 (7)   |
| Sb1—Cl41                      | 3.049 (7)   | Sb2—Cl40                                | 3.031 (7)   |
| Sb1—Cl40                      | 3.098 (7)   | Sb2—Cl31                                | 2.991 (7)   |
| (150 K)                       |             |                                         |             |
| Sb1—Cl10                      | 2.4042 (16) | Sb2—Cl13                                | 2.4306 (18) |
| Sb1—Cl11                      | 2.4194 (19) | Sb2—Cl12                                | 2.4384 (17) |
| Sb1—Cl20                      | 2.4893 (19) | Sb2—Cl21                                | 2.4406 (17) |
| Sb1—Cl30                      | 2.8004 (15) | Sb2—Cl40 <sup>v</sup>                   | 2.9690 (18) |
| Sb1—Cl40                      | 3.0433 (18) | Sb2—Cl41                                | 3.0244 (16) |
| Sb1—Cl41                      | 3.1939 (16) | Sb2—Cl31                                | 2.9999(17)  |
| (270 K)                       |             |                                         |             |
| Cl1—Sb1—Cl1 <sup>i</sup>      | 90.2 (2)    | Cl2—Sb1—Cl4                             | 87.00 (10)  |
| Cl1—Sb1—Cl2                   | 90.79 (16)  | Cl3—Sb1—Cl4                             | 92.21 (19)  |
| Cl1 <sup>i</sup> —Sb1—Cl2     | 90.79 (16)  | Cl1—Sb1—Cl4 <sup>ii</sup>               | 177.77 (13) |
| Cl1—Sb1—Cl3                   | 90.0 (2)    | Cl1 <sup>i</sup> —Sb1—Cl4 <sup>ii</sup> | 89.49 (11)  |
| Cl1 <sup>i</sup> —Sb1—Cl3     | 90.0 (2)    | Cl2—Sb1—Cl4 <sup>ii</sup>               | 87.00 (10)  |
| Cl2—Sb1—Cl3                   | 178.9 (3)   | Cl3—Sb1—Cl4 <sup>ii</sup>               | 92.21 (19)  |
| Cl1—Sb1—Cl4                   | 89.49 (11)  | Cl4—Sb1—Cl4 <sup>ii</sup>               | 90.75 (2)   |
| Cl1 <sup>i</sup> —Sb1—Cl4     | 177.77 (13) |                                         |             |
| (255 K)                       |             |                                         |             |
| Cl10 <sup>iii</sup> —Sb1—Cl10 | 90.2 (4)    | Cl12 <sup>iv</sup> —Sb2—Cl21            | 90.7 (2)    |
| Cl10 <sup>iii</sup> —Sb1—Cl20 | 90.5 (3)    | Cl12—Sb2—Cl21                           | 90.7 (2)    |
| Cl10—Sb1—Cl20                 | 90.5 (3)    | Cl12 <sup>iv</sup> —Sb2—Cl40            | 89.0 (2)    |
| Cl10 <sup>iii</sup> —Sb1—Cl30 | 87.1 (3)    | Cl12—Sb2—Cl40                           | 176.4 (2)   |
| Cl10—Sb1—Cl30                 | 87.1 (3)    | Cl21—Sb2—Cl40                           | 85.7 (2)    |
| Cl20—Sb1—Cl30                 | 176.5 (4)   | Cl12 <sup>iv</sup> —Sb2—Cl31            | 25.19 (17)  |
| Cl10 <sup>iii</sup> —Sb1—Cl40 | 90.0 (2)    | Cl12—Sb2—Cl31                           | 69.55 (16)  |
| Cl10—Sb1—Cl40                 | 178.5 (2)   | Cl21—Sb2—Cl31                           | 77.58 (19)  |
| Cl20—Sb1—Cl40                 | 88.0 (2)    | Cl40—Sb2—Cl31                           | 109.08 (16) |
| Cl30—Sb1—Cl40                 | 94.4 (3)    | Sb2—Cl40—Sb1                            | 173.7 (3)   |

|                              |            |                             |            |
|------------------------------|------------|-----------------------------|------------|
| Cl12 <sup>iv</sup> —Sb2—Cl12 | 90.5 (3)   |                             |            |
| (240 K)                      |            |                             |            |
| Cl10—Sb1—Cl11                | 91.4 (4)   | Cl12—Sb2—Cl13               | 91.4 (4)   |
| Cl10—Sb1—Cl20                | 90.9 (5)   | Cl21—Sb2—Cl13               | 90.3 (4)   |
| Cl11—Sb1—Cl20                | 89.0 (4)   | Cl12—Sb2—Cl41               | 89.1 (3)   |
| Cl10—Sb1—Cl30                | 90.3 (4)   | Cl21—Sb2—Cl41               | 85.8 (3)   |
| Cl11—Sb1—Cl30                | 84.0 (3)   | Cl13—Sb2—Cl41               | 176.1 (3)  |
| Cl20—Sb1—Cl30                | 172.9 (4)  | Cl12—Sb2—Cl40               | 174.8 (4)  |
| Cl10—Sb1—Cl41                | 176.2 (4)  | Cl21—Sb2—Cl40               | 82.6 (3)   |
| Cl11—Sb1—Cl41                | 87.9 (3)   | Cl13—Sb2—Cl40               | 89.5 (3)   |
| Cl20—Sb1—Cl41                | 92.8 (4)   | Cl41—Sb2—Cl40               | 89.7 (2)   |
| Cl30—Sb1—Cl41                | 85.9 (2)   | Sb2—Cl41—Sb1                | 165.2 (3)  |
| Cl12—Sb2—Cl21                | 92.3 (4)   |                             |            |
| (150 K)                      |            |                             |            |
| Cl10—Sb1—Cl11                | 90.91 (6)  | Cl30—Sb1—Cl41               | 103.70 (4) |
| Cl10—Sb1—Cl20                | 89.12 (6)  | Cl40—Sb1—Cl41               | 88.70 (5)  |
| Cl11—Sb1—Cl20                | 90.73 (9)  | Cl13—Sb2—Cl12               | 92.14 (6)  |
| Cl10—Sb1—Cl30                | 83.99 (5)  | Cl13—Sb2—Cl21               | 91.44 (7)  |
| Cl11—Sb1—Cl30                | 89.19 (6)  | Cl12—Sb2—Cl21               | 89.35 (6)  |
| Cl20—Sb1—Cl30                | 173.10 (6) | Cl13—Sb2—Cl40 <sup>v</sup>  | 89.42 (6)  |
| Cl10—Sb1—Cl40                | 88.78 (5)  | Cl12—Sb2—Cl40 <sup>v</sup>  | 176.19 (6) |
| Cl11—Sb1—Cl40                | 171.99 (7) | Cl21—Sb2—Cl40 <sup>v</sup>  | 87.14 (6)  |
| Cl20—Sb1—Cl40                | 97.26 (7)  | Cl13—Sb2—Cl41               | 173.02 (6) |
| Cl30—Sb1—Cl40                | 82.82 (5)  | Cl12—Sb2—Cl41               | 88.86 (5)  |
| Cl10—Sb1—Cl41                | 171.54 (5) | Cl21—Sb2—Cl41               | 81.66 (5)  |
| Cl11—Sb1—Cl41                | 92.71 (6)  | Cl40 <sup>v</sup> —Sb2—Cl41 | 89.17 (5)  |
| Cl20—Sb1—Cl41                | 83.20 (6)  | Sb2—Cl41—Sb1                | 162.73 (6) |

Symmetry code(s): (i)  $-x+1/2, y, z$ ; (ii)  $x+1/2, -y+1, -z-1$ ; (iii)  $-x, y, z$ ; (iv)  $-x-1, y, z$ ; (v)  $x+1, y, z$ .

**Table S2. Selected hydrogen-bond parameters**

| $D-H\cdots A$                          | $D-H$ (Å) | $H\cdots A$ (Å) | $D\cdots A$ (Å) | $D-H\cdots A$ (°) |
|----------------------------------------|-----------|-----------------|-----------------|-------------------|
| (240 K)                                |           |                 |                 |                   |
| N5—H5A $\cdots$ Cl30                   | 0.89      | 2.53            | 3.33 (3)        | 149.6             |
| N5—H5B $\cdots$ Cl40                   | 0.89      | 2.61            | 3.44 (3)        | 154.2             |
| N6—H6A $\cdots$ Cl13                   | 0.89      | 2.82            | 3.47 (2)        | 131.1             |
| N6—H6A $\cdots$ Cl40                   | 0.89      | 2.59            | 3.29 (2)        | 135.5             |
| N6—H6B $\cdots$ Cl41 <sup>ii</sup>     | 0.89      | 2.33            | 3.21 (3)        | 169.5             |
| N13—H13A $\cdots$ Cl31 <sup>iii</sup>  | 0.89      | 2.37            | 3.20 (4)        | 155.7             |
| N13—H13B $\cdots$ Cl20 <sup>iv</sup>   | 0.89      | 2.66            | 3.34 (4)        | 134.1             |
| N13—H13B $\cdots$ Cl40 <sup>iii</sup>  | 0.89      | 2.73            | 3.35 (3)        | 127.9             |
| N17—H17A $\cdots$ Cl30 <sup>v</sup>    | 0.89      | 2.37            | 3.24 (3)        | 163.9             |
| N17—H17B $\cdots$ Cl31 <sup>iii</sup>  | 0.89      | 2.27            | 3.14 (3)        | 164.0             |
| (150 K)                                |           |                 |                 |                   |
| N5—H5A $\cdots$ Cl31 <sup>vi</sup>     | 0.89      | 2.24            | 3.114 (5)       | 167.0             |
| N5—H5B $\cdots$ Cl20 <sup>vi</sup>     | 0.89      | 2.55            | 3.315 (6)       | 144.8             |
| N5—H5B $\cdots$ Cl41 <sup>vi</sup>     | 0.89      | 2.72            | 3.280 (5)       | 121.9             |
| N8—H8A $\cdots$ Cl30 <sup>vii</sup>    | 0.89      | 2.34            | 3.202 (6)       | 162.5             |
| N8—H8B $\cdots$ Cl31 <sup>vi</sup>     | 0.89      | 2.28            | 3.137 (5)       | 160.8             |
| N15—H15A $\cdots$ Cl30 <sup>viii</sup> | 0.89      | 2.46            | 3.237 (5)       | 146.7             |
| N15—H15B $\cdots$ Cl41 <sup>vii</sup>  | 0.89      | 2.45            | 3.276 (5)       | 155.0             |
| N16—H16A $\cdots$ Cl40                 | 0.89      | 2.30            | 3.187 (6)       | 177.6             |
| N16—H16B $\cdots$ Cl12                 | 0.89      | 2.80            | 3.447 (5)       | 130.6             |
| N16—H16B $\cdots$ Cl41                 | 0.89      | 2.59            | 3.248 (5)       | 131.4             |

Symmetry code(s): (i)  $x+1/2, -y+1, -z-1$ ; (ii)  $x+1, y, z$ ; (iii)  $x+1/2, -y, z-1/2$ ; (iv)  $x+3/2, -y, z-1/2$ ; (v)  $x+1/2, -y+1, z-1/2$ ; (vi)  $x-1, y, z$ ; (vii)  $x, y-1, z$ ; (viii)  $x+1, y-1, z$ .

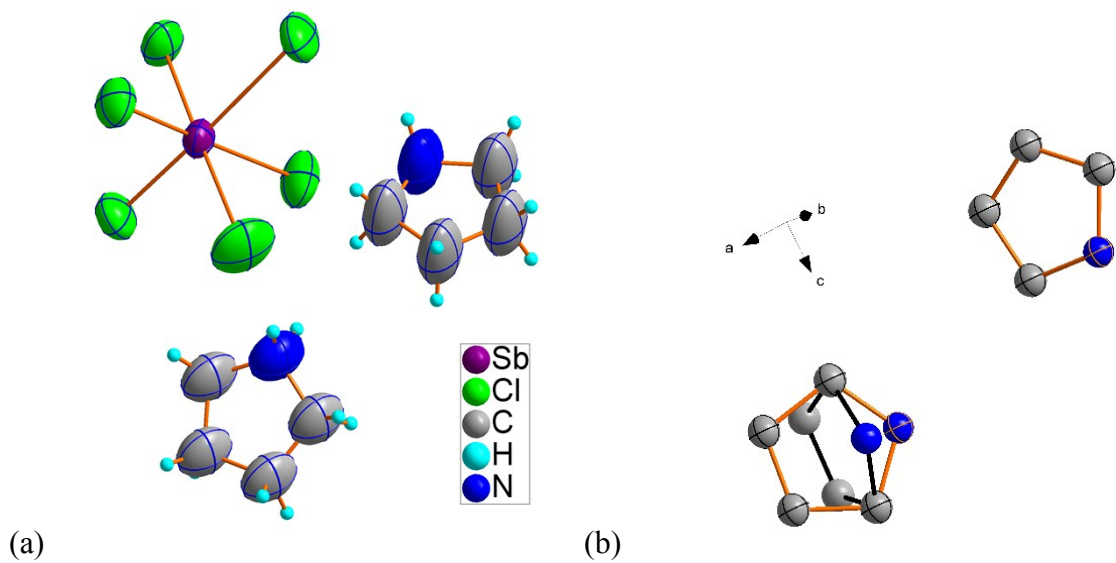

**Fig. S2** (a) The content of the asymmetric unit in Phase I, T=270 K;  
 (b) the disorder of Pyr<sup>+</sup> in Phase I.

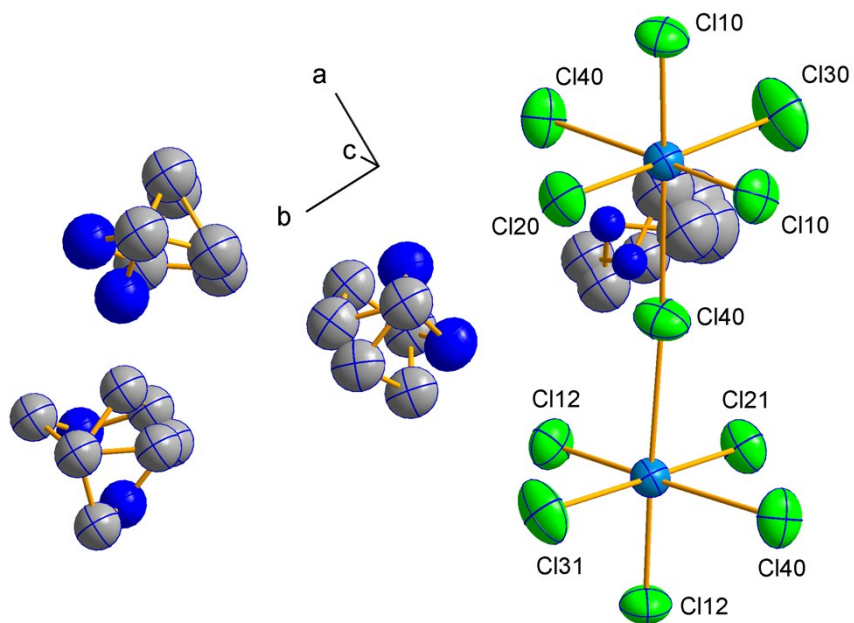

**Fig. S3.** The content of the asymmetric unit in Phase II, T=255 K, the ellipsoids are drawn at 25% probability level.

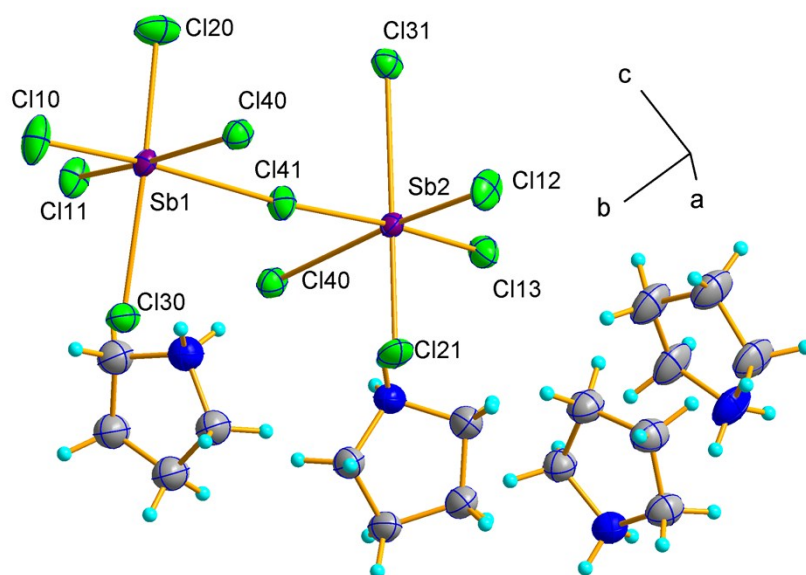

**Fig. S4.** the content of the asymmetric unit in Phase III, T=240 K, the ellipsoids are drawn at 25% probability level.

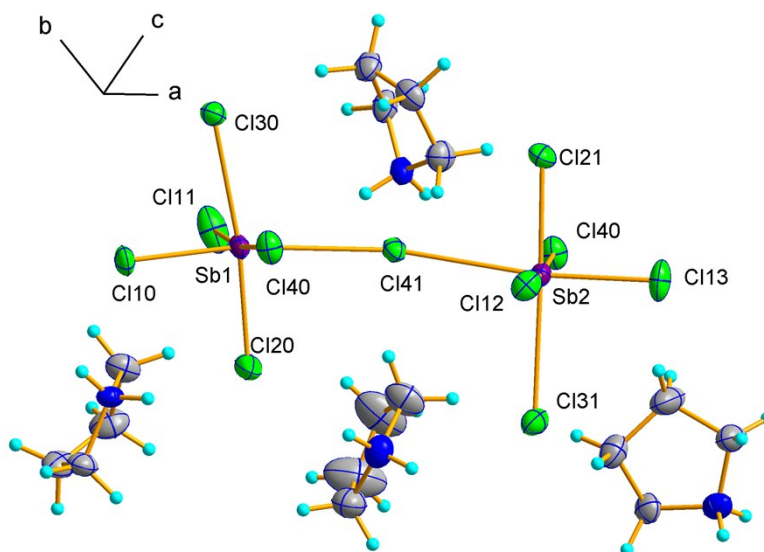

**Fig. S5.** The content of the asymmetric unit in Phase IV, T=150 K, the ellipsoids are drawn at 50% probability level.

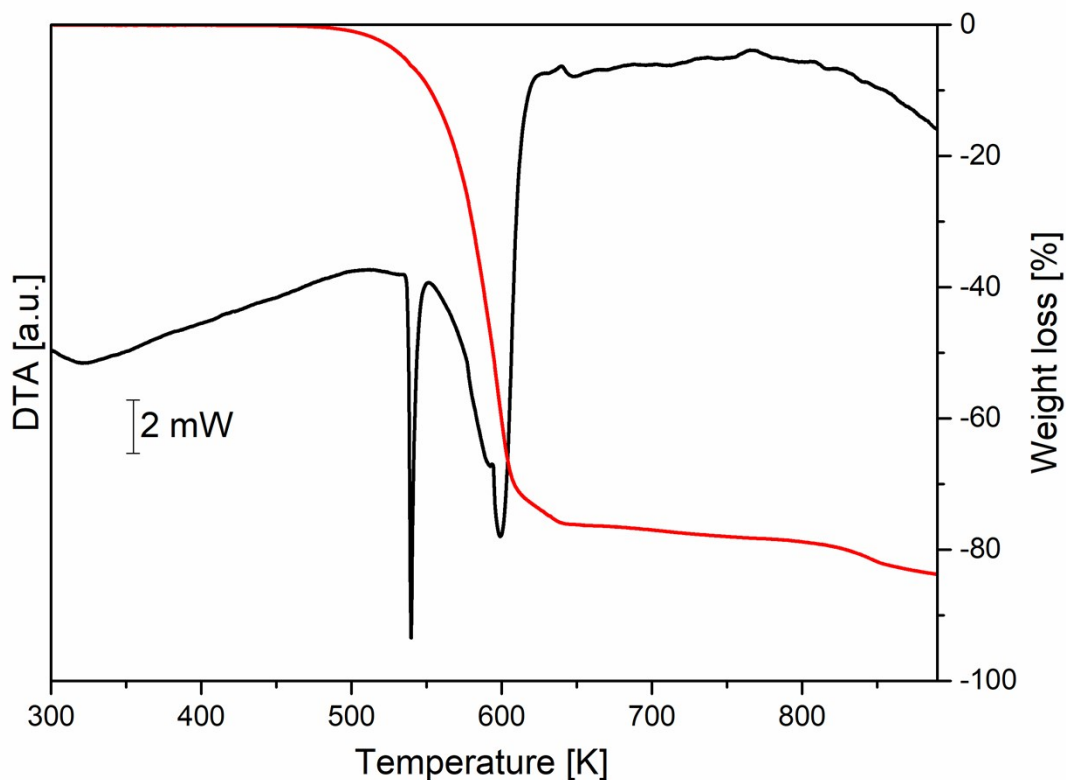

**Fig. S6.** Thermograms of TGA and DTA.

**Table S3.** The results of the symmetry mode analysis, phase transition I to II (distortion of the inorganic part of the structure).

| WP |         | Atom  | Atomic Displacements |         |         |        |
|----|---------|-------|----------------------|---------|---------|--------|
|    |         |       | ux                   | uy      | uz      | u      |
| 2a | (0,y,z) | Sb1   | 0.0000               | -0.0172 | -0.0015 | 0.1931 |
| 2a | (0,y,z) | Sb1_2 | 0.0000               | -0.0180 | -0.0014 | 0.2010 |
| 4b | (x,y,z) | Cl4   | 0.0019               | -0.0224 | -0.0100 | 0.3064 |
| 2a | (0,y,z) | Cl2   | 0.0000               | -0.0066 | -0.0043 | 0.1059 |
| 2a | (0,y,z) | Cl2_2 | 0.0000               | -0.0084 | -0.0048 | 0.1265 |
| 2a | (0,y,z) | Cl3   | 0.0000               | -0.0227 | 0.0085  | 0.2944 |
| 2a | (0,y,z) | Cl3_2 | 0.0000               | -0.0401 | 0.0135  | 0.5063 |
| 4b | (x,y,z) | Cl1   | -0.0009              | -0.0127 | 0.0020  | 0.1456 |
| 4b | (x,y,z) | Cl1_2 | 0.0018               | -0.0105 | 0.0029  | 0.1286 |

NOTE: ux, uy and uz are given in relative units. |u| is the absolute distance given in Å; Maximum atomic displacement in the distortion,  $\Delta$ : 0.5063 Å. Total distortion amplitude: 1.1926 Å (Pnma 0.2182 Å, Pmn2<sub>1</sub> 1.1724 Å).



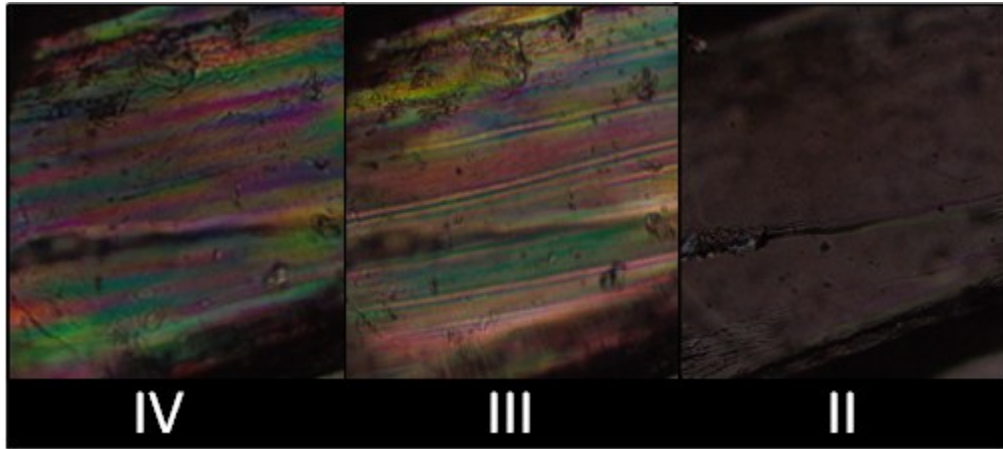

**Fig. S7.** Evolution of the domain structures at different phases.

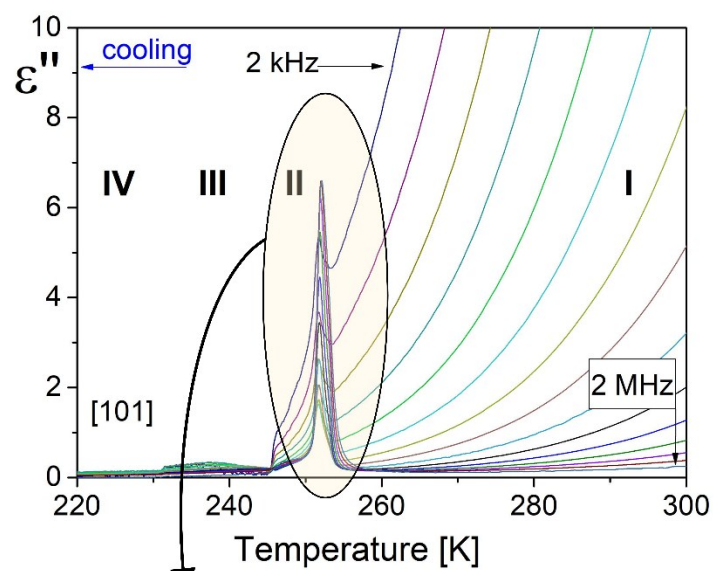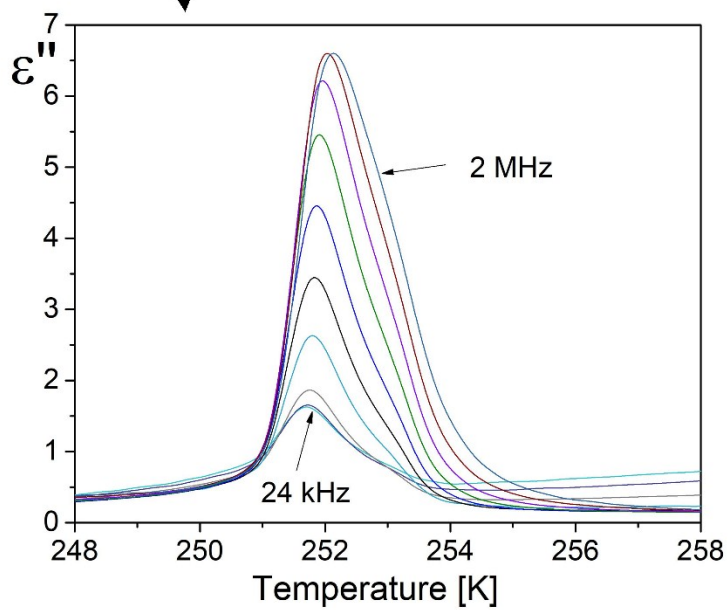

**Fig. S8.** Imaginary part of complex electric permittivity measured along the [101] direction during cooling.

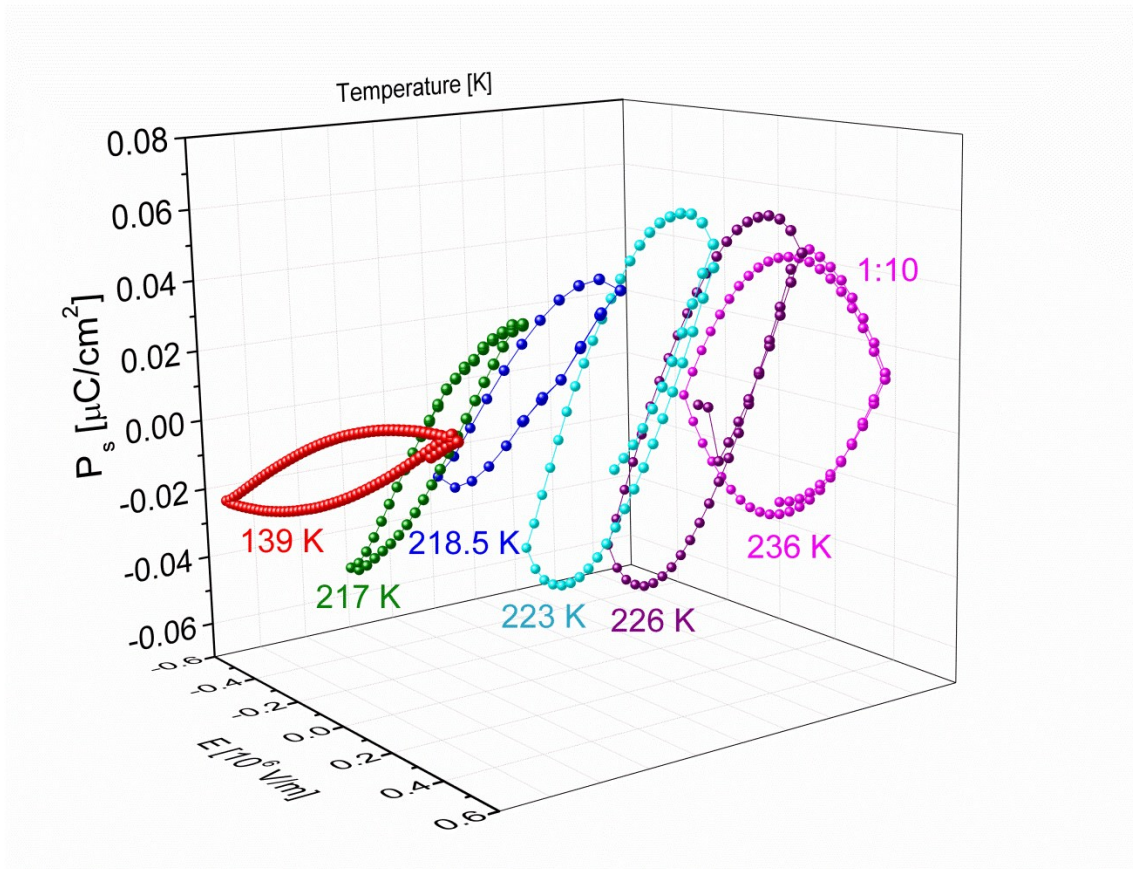

**Fig. S9.** Evolution of hysteresis loops between 139 K and 236 K.

**Table S4.** Activation energies, correlation times and motional constants evaluated for PCA.

| Temperature range | Component | $E_a$ (kJ/mol) | $\tau_0$ [s]          | $C$ [ $\text{s}^{-2}$ ] |
|-------------------|-----------|----------------|-----------------------|-------------------------|
| - 120 K           |           | 5.56           | $1.6 \cdot 10^{-12}$  | $4.35 \cdot 10^8$       |
| 120 K-170 K       | short     | 7.81           | $5.7 \cdot 10^{-12}$  | $3.82 \cdot 10^8$       |
| 197 K-244 K       |           | 22.82          | $2.85 \cdot 10^{-14}$ | $1.38 \cdot 10^8$       |
| 248 K -           |           | 12.2           |                       |                         |

The temperature dependence of the second moment of the proton resonance lines ( $M_2$ ) of PCA is shown in Fig. S10. It is seen that between 95 and 140 K the second moment has a plateau of about 19  $\text{G}^2$ . Above 140 K the two reduction of the  $M_2$  are visible. First reduction  $\Delta M_2(1)$  occurs around 170 and the next one  $\Delta M_2(2)$  around 240 K. The continually decreasing

of the  $M_2$  values is abruptly broken close to PTs temperature at 248 and at 255 K. The remaining PT at 236 K is not reflected in the observed course of  $M_2$  reductions. Through the PTs at 248 K and 255 K a sharp decrease in the second moment from 7.3 G<sup>2</sup> to 4.1 G<sup>2</sup> is visible. After next narrowing of the proton NMR line the values of the  $M_2$  stabilizes at about 3.2 G<sup>2</sup> up to 290 K which means that the full isotropic motion of the pyrrolidinium cation is still not reached.

The basic equation for the dipolar second moment,  $M_2$ , of a dipolar NMR line was derived by equation:<sup>1</sup>

$$M_2 = \frac{3}{5} I(I+1) \gamma^2 \hbar^2 \frac{1}{N} \sum_{i=1}^N \sum_{j=1}^N R_{ij}^{-6} \quad (1)$$

where  $N$  is the number of protons in the unit cell. The rigid value of  $M_2$  calculated from the crystal structure of PCA appeared to be about 20.1 G<sup>2</sup> with assumed lengths of bonds: C-H 1.09 Å and N-H 1.03 Å. Such result of theoretical calculation shows almost perfect compability with measured experimental value and it should be emphasized the lack of any disturbing quadrupole interaction of neighboring quadrupole nuclei.<sup>2,3</sup> Analysis of the temperature dependence of  $M_2$  can be performed on the basis of the BPP formula:

$$M_2 = \Delta M_2(1) \frac{2}{\pi} \tan^{-1}(\gamma_H \tau_c \sqrt{M_2}) + \Delta M_2(2) \frac{2}{\pi} \tan^{-1}(\gamma_H \tau_c \sqrt{M_2}) + M_2^{\text{Motion}} \quad (2)$$

where  $\tau_c = \tau_0 \exp(E_a/RT)$ ,  $M_2^{\text{Rigid}}$  (where  $M_2^{\text{Rigid}} = \Delta M_2(1) + \Delta M_2(2) + M_2^{\text{Motion}}$ ) and  $M_2^{\text{Motion}}$  are the second-moment values before and after of both second moment reduction, respectively. The reduction of the second moment has been fitted with equation (2) with the activation energy of 39.47 kJ·mol<sup>-1</sup> and the correlation time of 2.98 10<sup>-14</sup> s for the first reduction of  $M_2$  and with the activation energy of 28.34 kJ·mol<sup>-1</sup> and the correlation time of 3.94 10<sup>-14</sup> s for the second reduction of  $M_2$ . Such obtained dynamical parameters are typical for planar cations.<sup>4</sup>

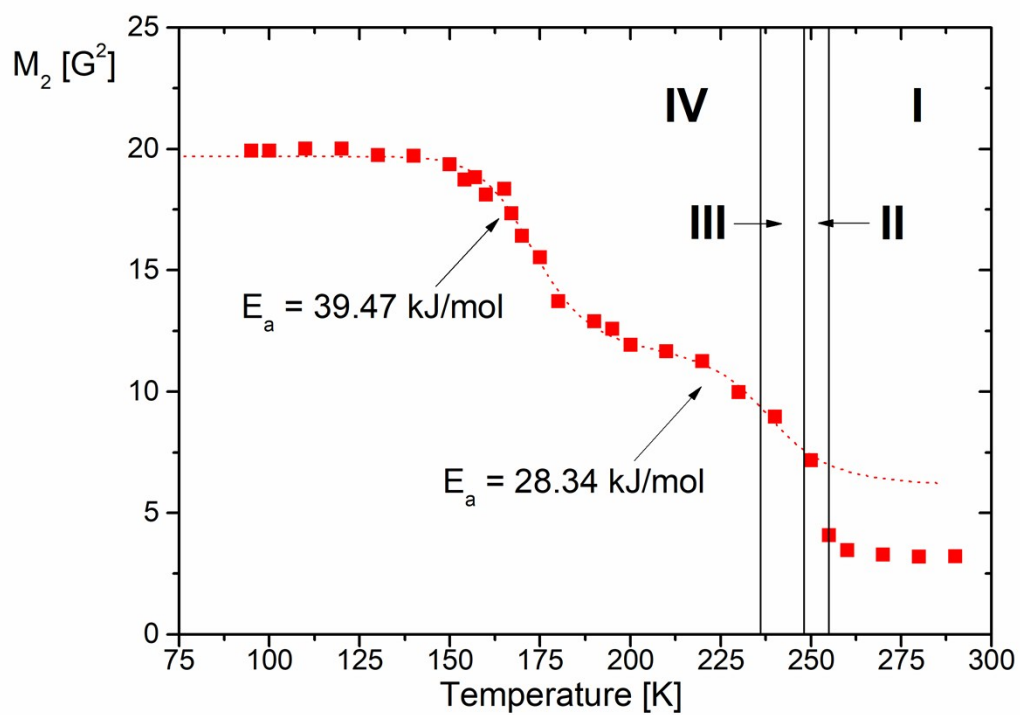

**Fig. S10.** Temperature dependence of the second moment ( $M_2$ ) of the proton NMR lines.

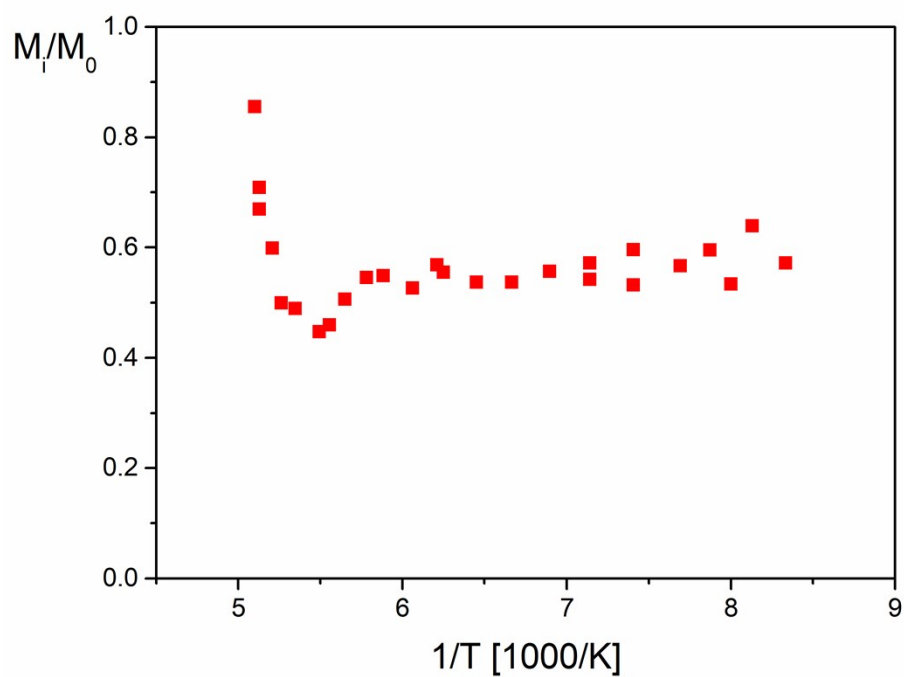

**Fig. S11.** Temperature dependence of the contribution of both proton magnetization for PCA.

Below 120 K and above 197 K the recovery function have one-exponential shape due to a fast spin diffusion and the only one relaxation time  $T_1$  was well-fitted from it. In turn, there is no a fast spin diffusion between 120 K and 197 K and a recovery curve should be separated into at least two relaxation times,  $T_1^S$  and  $T_1^L$  ( $T_1^S < T_1^L$ ), according to the equation

$$(M_0 - M_z(\tau))/M_0 = A^S \exp(-\tau/T_1^S) + A^L \exp(-\tau/T_1^L) \quad (3)$$

where  $M_0$  and  $M_z(t)$  are components of magnetization at thermal equilibrium and at time  $\tau$  after the saturation sequence, respectively.  $A^S$  and  $A^L$  are constants and  $A^S + A^L = 1$ . In the temperature range from 120 K to 197 K, the mutual relation between the two observed components seems to be in the 1:1 proportion (The temperature course of percentage proportion of one magnetization of both ones is presented in Figure S11).

- 1 J. H. Van Vleck, *Phys. Rev.*, 1948, **74**, 1168–1183.
- 2 A. Piecha, R. Jakubas, A. Pietraszko, J. Baran, W. Medycki and D. Kruk, *J. Solid State Chem.*, 2009, **182**, 2949–2960.
- 3 D. Kruk, W. Medycki, A. Mielczarek, R. Jakubas and C. Uniszkievicz, *Appl. Magn. Reson.*, 2010, **39**, 233–249.
- 4 P. Szklarz, J. Zaleski, R. Jakubas, G. Bator, W. Medycki and K. Falińska, *J. Phys. Condens. Matter*, 2005, **17**, 2509–2528.
